# Supplementary material
Source: Springer Nature journal article supplement (https://www.springermedizin.de/resource/supplementary/12865_2008_233_MOESM6_ESM.pdf/9427562)

1.1

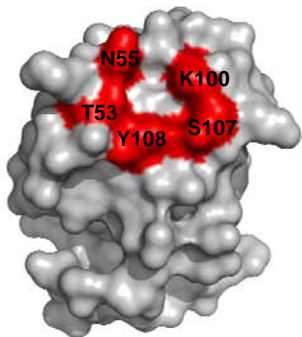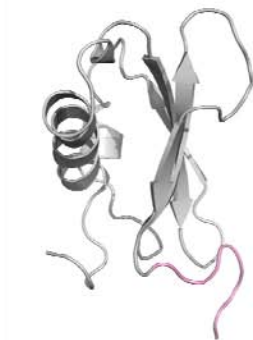

1.2

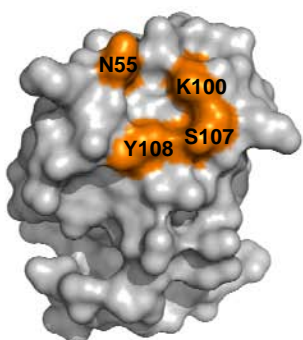

90°

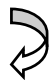

1.5

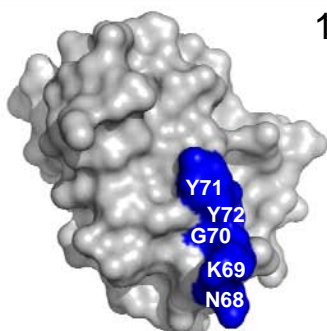

1.3

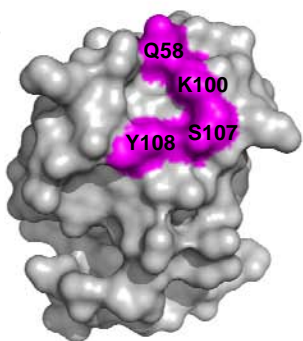

45°

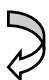

1.6

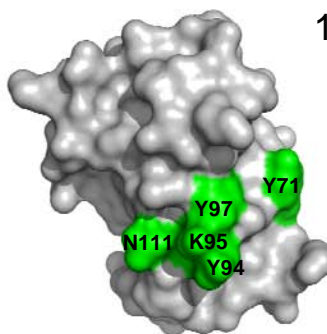

1.4

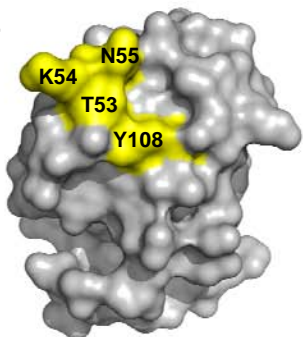

90°

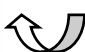

2.1

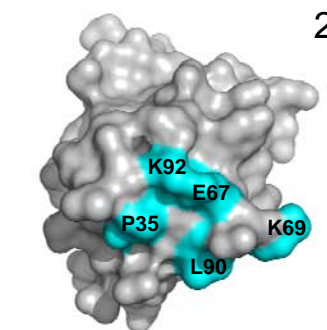

20 Å

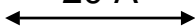

Supplement: MOESM6 [file 9427562]
